# Supplementary material for: Template-synthesized ultra-thin molecularly imprinted polymers membrane for the selective preconcentration of dyes
Source: Royal Society of Chemistry journal article supplement (doi:10.1039/c4ta07150f), 2015-01-01
Supplement: c4ta07150f1.pdf [file c4ta07150f1.pdf]

## ***Electronic Supporting Information***

### **Template synthesized ultra-thin molecularly imprinted polymers membrane for selective preconcentration of dyes**

Lili Lu,<sup>a,b</sup> Xianyang Yue,<sup>b</sup> Fuquan Lin,<sup>a,c</sup> Feng Huang,<sup>b</sup> Bintian Zhang<sup>\*c</sup> and Zhang Lin<sup>\*c,d</sup>

<sup>a</sup>College of Chemistry, Fuzhou University, Fuzhou, Fujian 350002, China.

<sup>b</sup>Key Laboratory of Optoelectronic Materials Chemistry and Physics, Fujian Institute of Research on the Structure of Matter, Chinese Academy of Sciences, Fuzhou, Fujian 350002, China.

<sup>c</sup>Key Laboratory of Design and Assembly of Functional Nanostructures, Fujian Institute of Research on the Structure of Matter, Chinese Academy of Sciences, Fuzhou, Fujian 350002, China. E-mail: btzhang@fjirsm.ac.cn; zlin@fjirsm.ac.cn; Tel: +86-591-83705474; Fax: +86-591-83705474

<sup>d</sup>School of Environment and Energy, South China University of Technology, Guangzhou 510006, China.

**Figure S1.** EDS spectra of MIPs and NIPs.

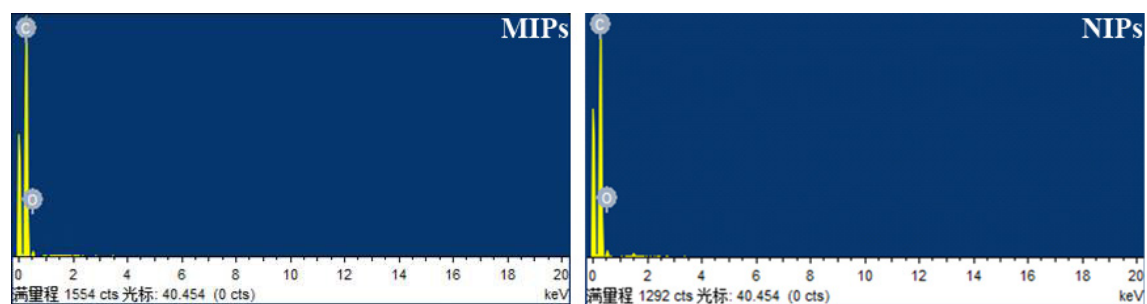

**Figure S2.** AFM image and data of membrane thickness for MIPs.

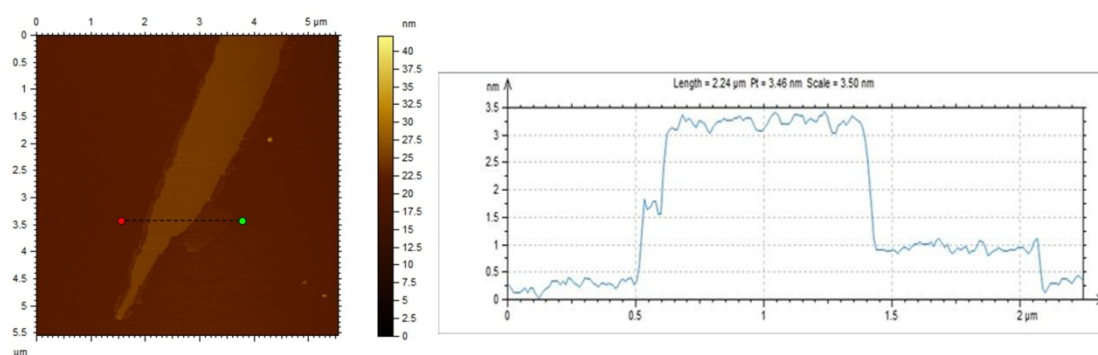

**Figure S3.** Nitrogen (77K) and Argon (87K) adsorption-desorption isotherms and the corresponding pore size distributions (the inset) calculated by the BJH method for MIPs.

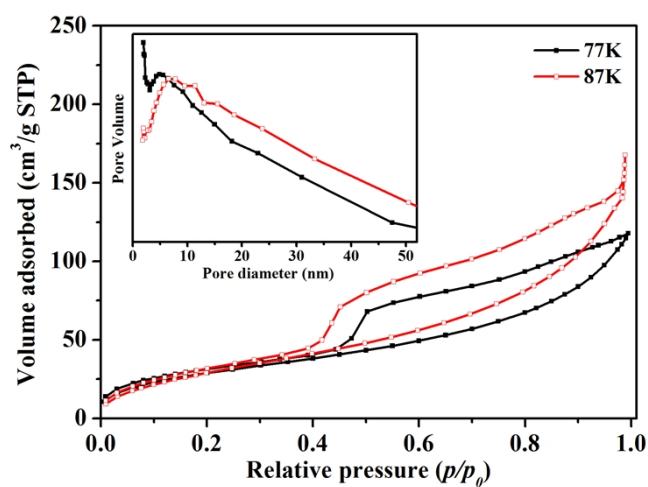

**Table S1.** Isotherm Model Constants for MIPs and NIPs

| Isotherm Model | Constant <sup>a</sup> | MIPs   | NIPs   |
|----------------|-----------------------|--------|--------|
| Langmuir       | $Q_{\max}$            | 100.1  | 60.4   |
|                | b                     | 0.210  | 0.202  |
|                | $R^2$                 | 0.9998 | 0.9997 |
| Freundlich     | logk                  | 1.2245 | 1.1084 |
|                | n                     | 2.57   | 3.04   |
|                | $R^2$                 | 0.9061 | 0.9153 |

<sup>a</sup> $Q_e$  is the adsorption amount at equilibrium (mg/g),  $C_e$  is the equilibrium concentration (mg/L),  $Q_{\max}$  is the maximum amount (mg/g) and b is the adsorption equilibrium constant (L/mg), k is the Freundlich constant (mg/g), and 1/n is the heterogeneity factor.
